# Supplementary material for: Synthesis of amphiphilic poly(ethylene glycol)-block-poly(methyl methacrylate) containing trityl ether acid cleavable junction group and its self-assembly into ordered nanoporous thin films
Source: publisher site journal article supplement (doi:10.1515/epoly-2020-0013), 2020-01-01
Supplement: Supplementary file 1 [file epoly-2020-0013_SM.pdf]

## Research Article

## Open Access

Yinghua Qi, Akash Nathani, Jianxin Zhang, Zhengji Song,  
Chandra Shekhar Sharma and Sunil K. Varshney\*

# Synthesis of amphiphilic poly(ethylene glycol)-*block*-poly(methyl methacrylate) containing trityl ether acid cleavable junction group and its self-assembly into ordered nanoporous thin films

## Supplementary material

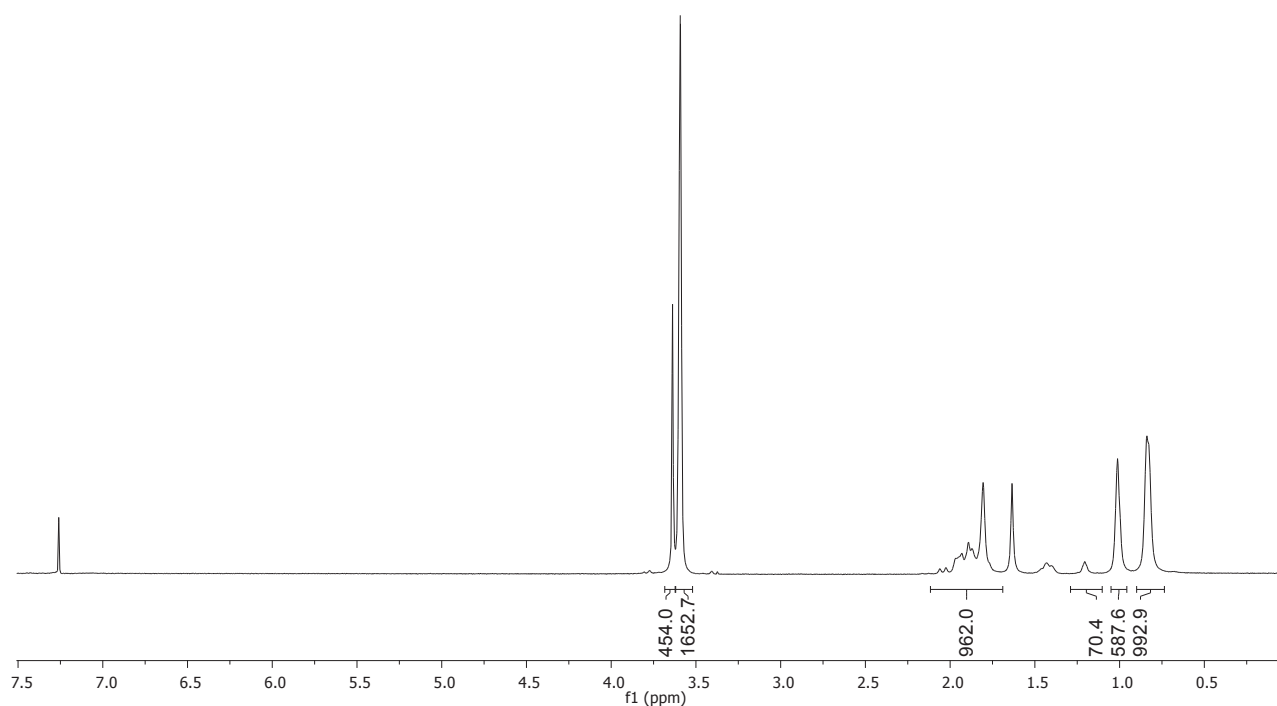

**Figure S1:** NMR spectrum of PEG-*b*-PMMA Polymer 1.

**\*Corresponding author: Sunil K. Varshney**, Polymer Source Inc.,  
124 Avro Street, Dorval (Montreal), Quebec H9P 2X8, Canada,  
email: info@polymersource.com

**Yinghua Qi, Jianxin Zhang, Zhengji Song and Sunil K. Varshney**,  
Polymer Source Inc., 124 Avro Street, Dorval (Montreal), Quebec H9P  
2X8, Canada

**Akash Nathani, Chandra Shekhar Sharma**, Creative & Advanced  
Research Based On Nanomaterials (CARBON) Lab, Department of  
Chemical engineering, Indian Institute of Technology, Hyderabad,  
Kandi-502285, Telangana, India

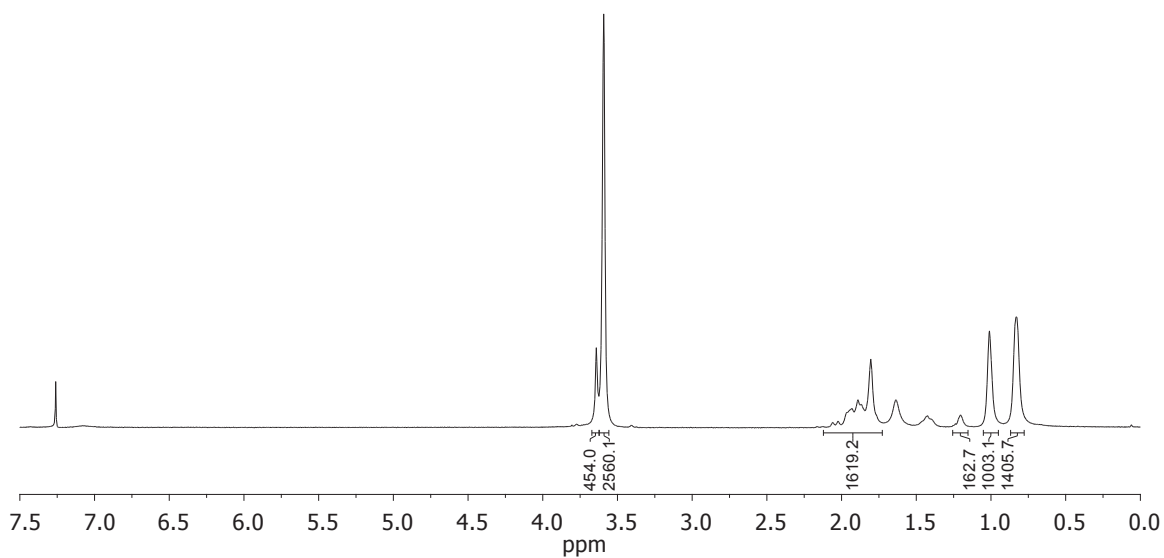

Figure S2: NMR spectrum of PEG-*b*-PMMA Polymer 2.

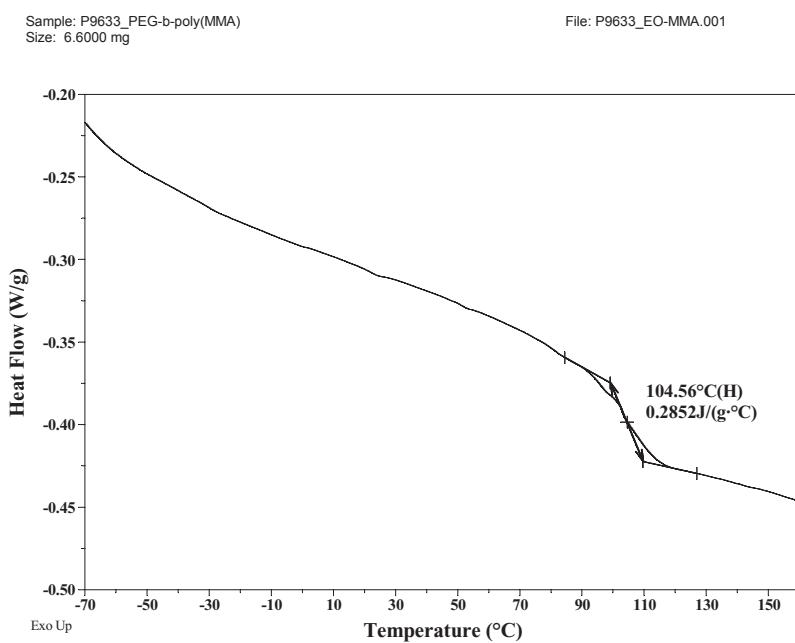

Figure S3: DSC curve of PEG-*b*-PMMA Polymer 1.

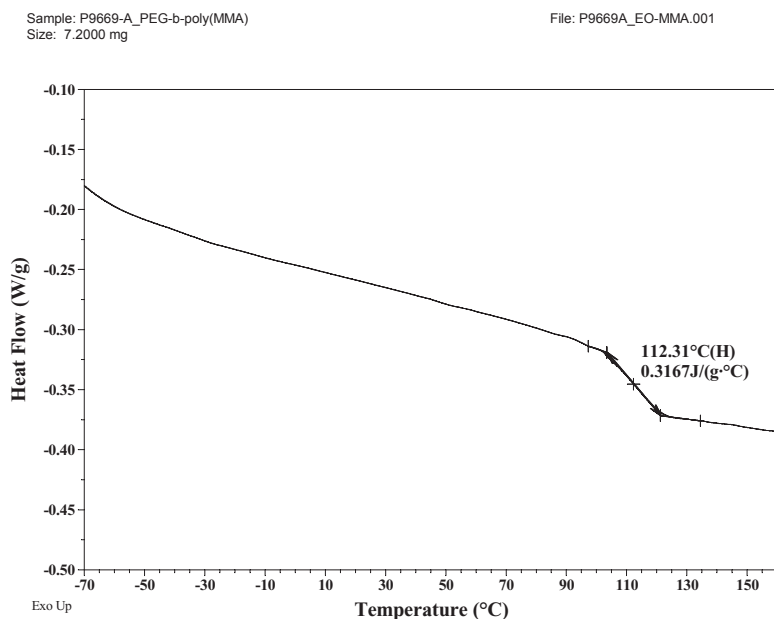

Figure S4: DSC curve of PEG-*b*-PMMA Polymer 2.

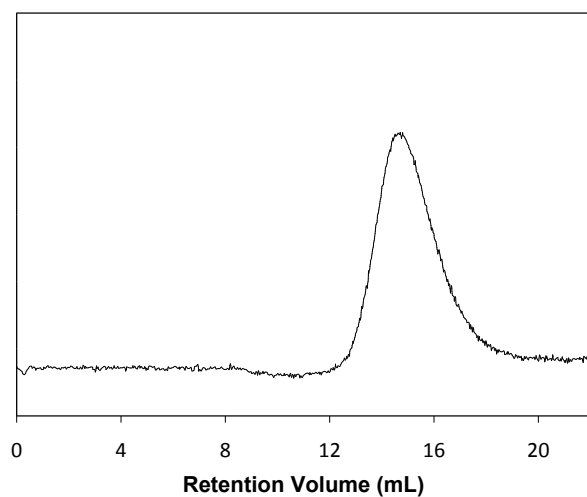

Figure S5: SEC curve of PEG-*b*-PMMA Polymer 1.

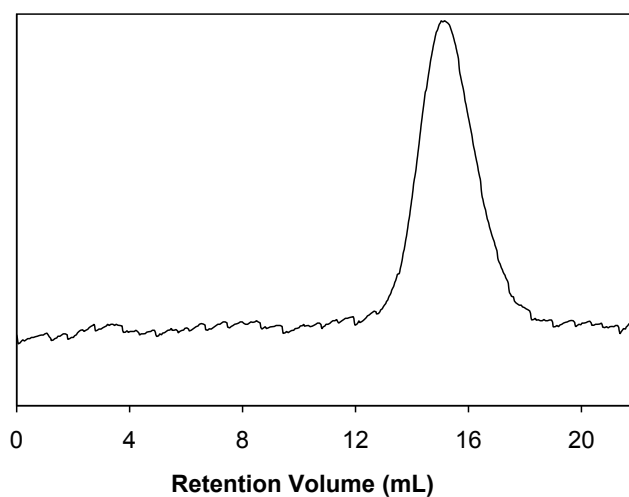

Figure S6: SEC curve of PEG-*b*-PMMA Polymer 2.

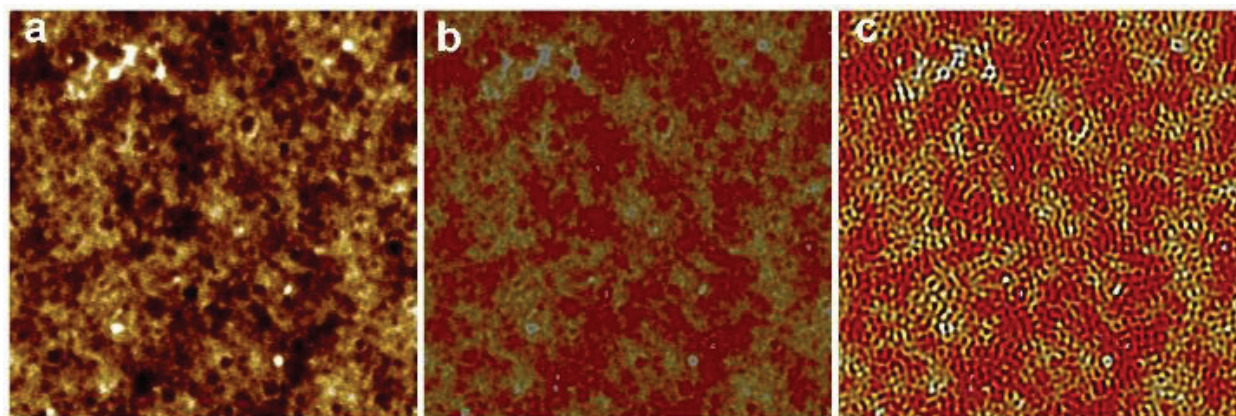

Figure S7: AFM height image of Polymer 1 after acid vapour treatment followed by washing (a) represents the same image as Figure 4c in the main text of manuscript; after passing the FFT bandpass filter (b); after removal of high-frequency noise and brightness adjustment (c).
